# Supplementary material
Source: publisher figshare collection journal article supplement (https://gsajournals.figshare.com/articles/dataset/_/13172369)
Supplement: Supplementary file 1 [file 1]

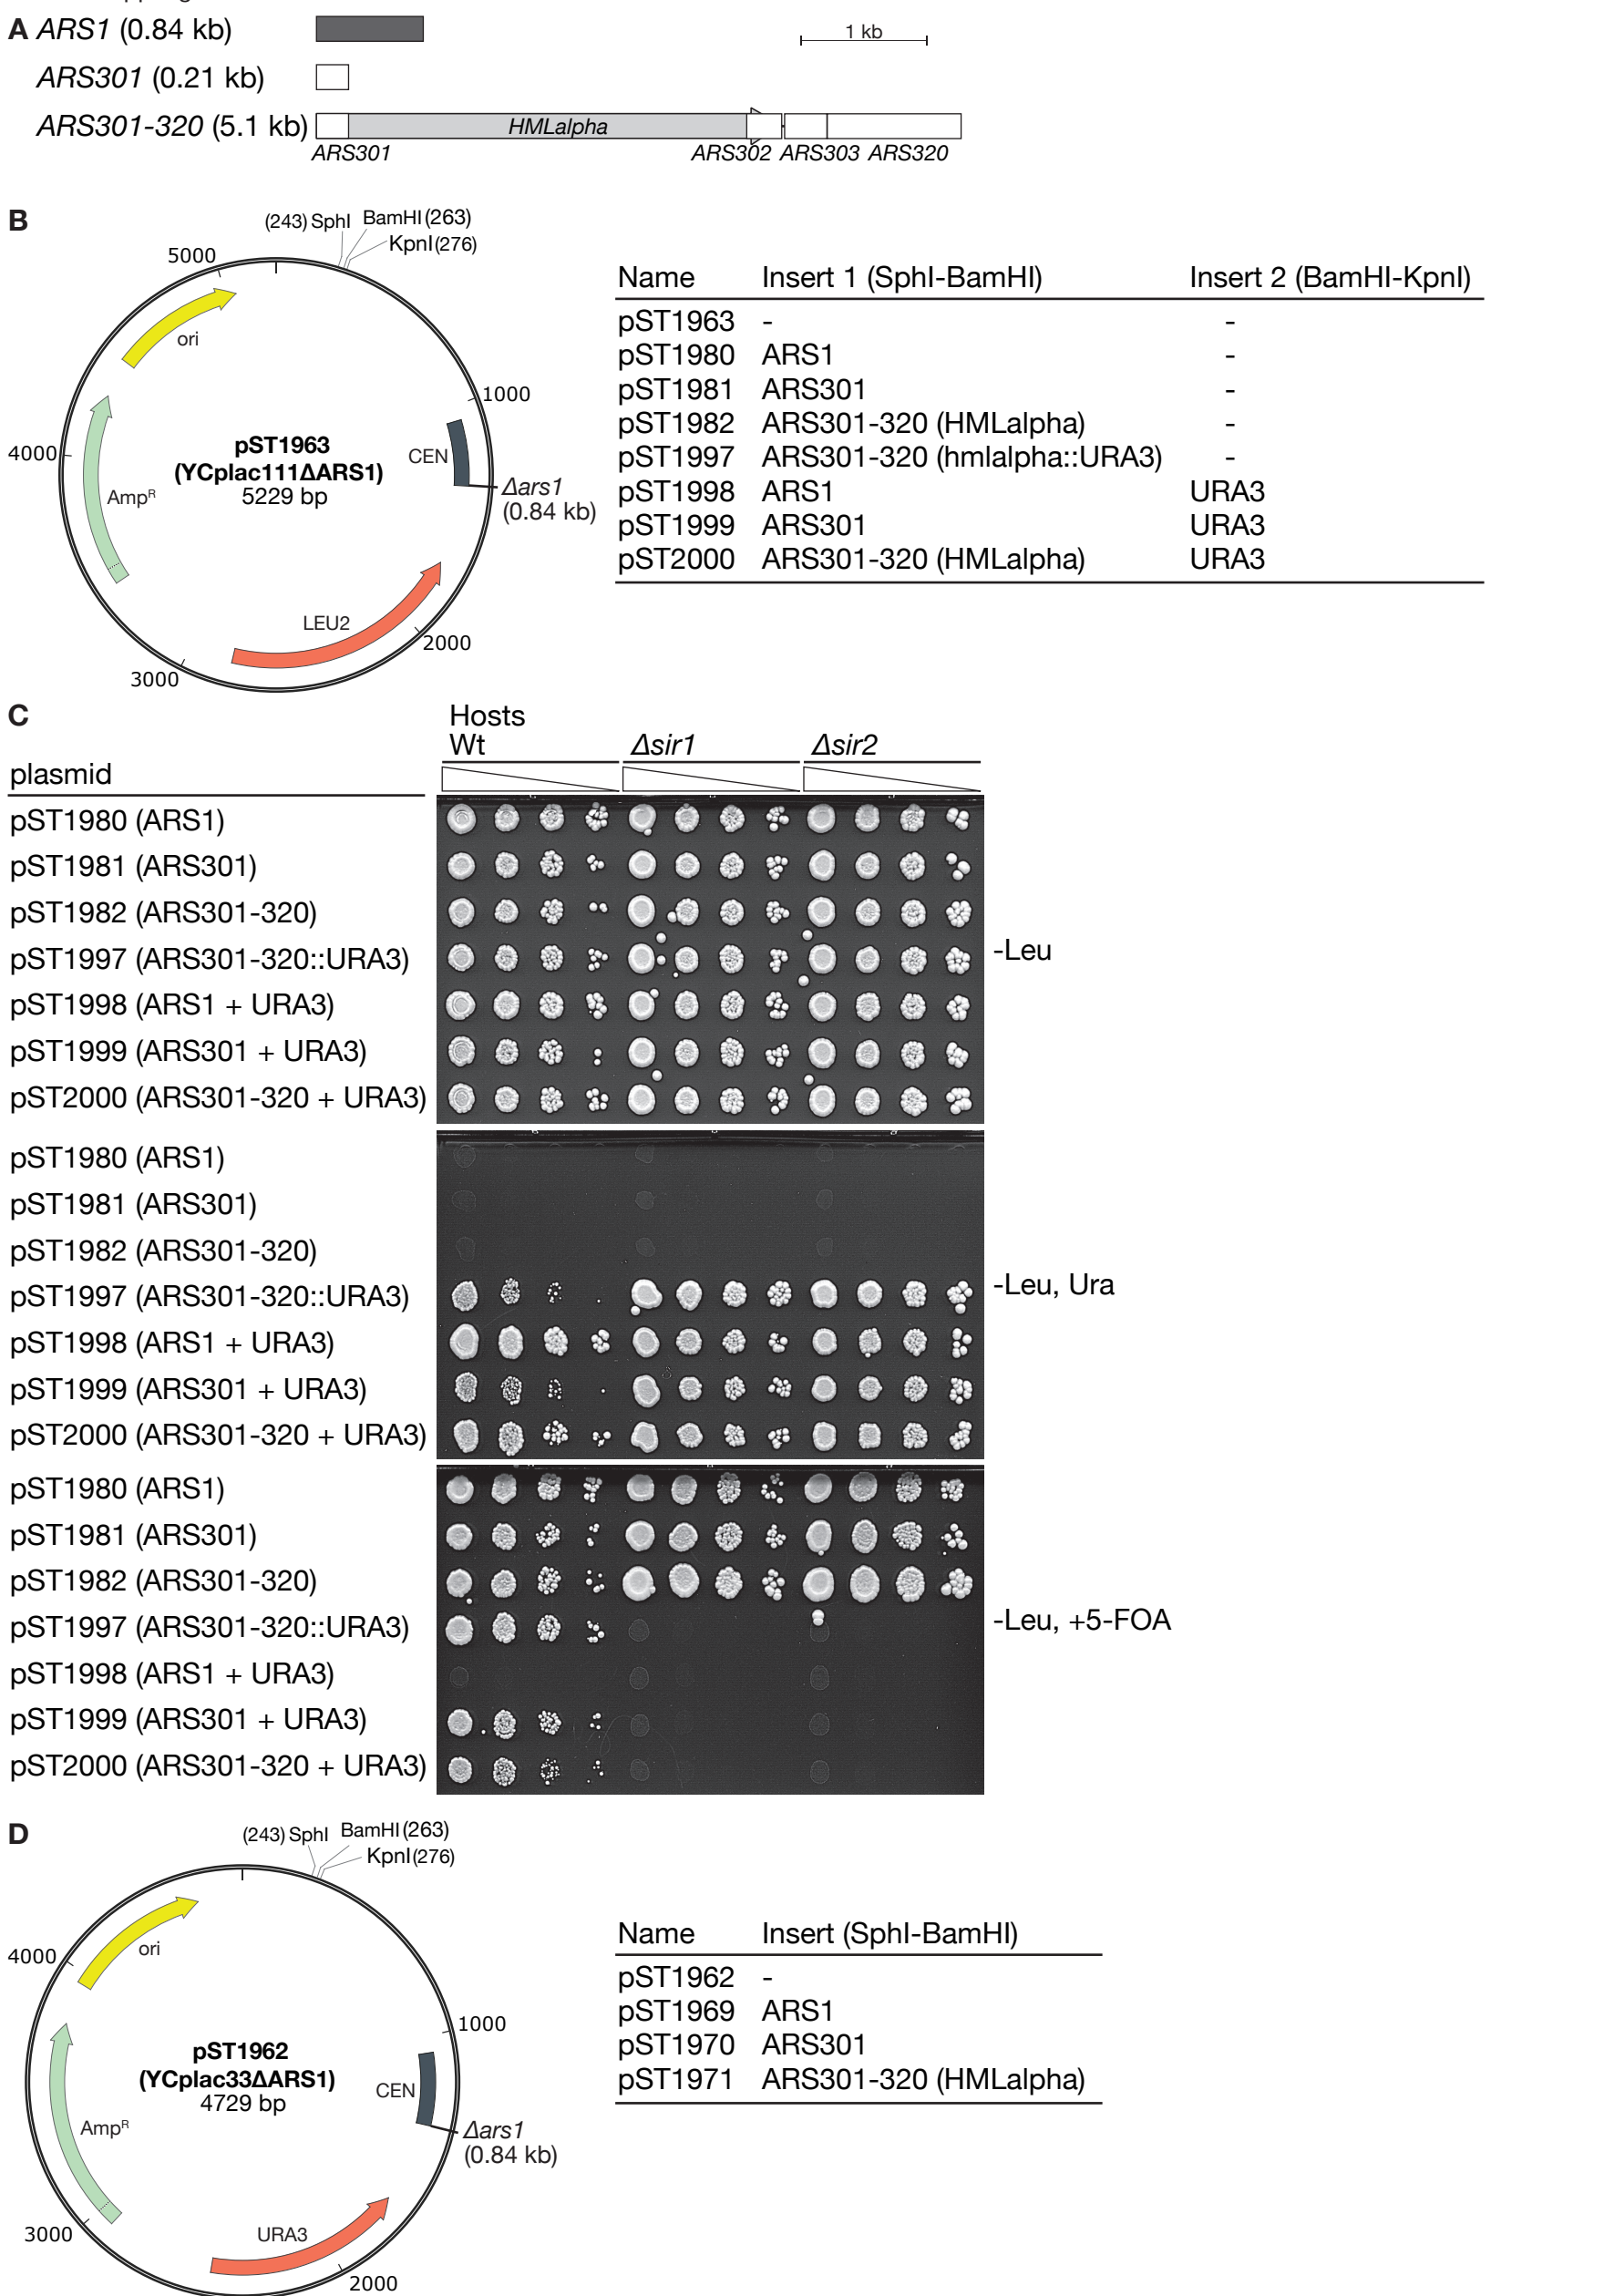

**Supplementary Figure S3. Structures of plasmids used in the plasmid loss assay.**

**A.** Schematics of the ARSs used. **B.** Schematics of the plasmid constructs used in C. pST1963 is a derivative of YCplac111 and lacks the *ARS1* sequence. *ARS1*, *HML1* ARSs were inserted into the indicated site of pST1963 to yield pST1980-82. *URA3* was inserted into pST1980-82 to yield pST1997-2000. **C.** The indicated plasmids were introduced into the wild type (Wt: W303-1a  $\Delta bar1$ ),  $\Delta sir1$  (YST1928), or  $\Delta sir2$  (YST1930), and transformed cells were serially diluted, spotted, and grown on the indicated selective plates. **D.** Schematics of plasmids used in the plasmid loss assay in Figs. 3 and 4C.
