# Supplementary material
Source: publisher figshare collection journal article supplement (https://gsajournals.figshare.com/articles/dataset/_/13172369)
Supplement: Supplementary file 2 [file 1]

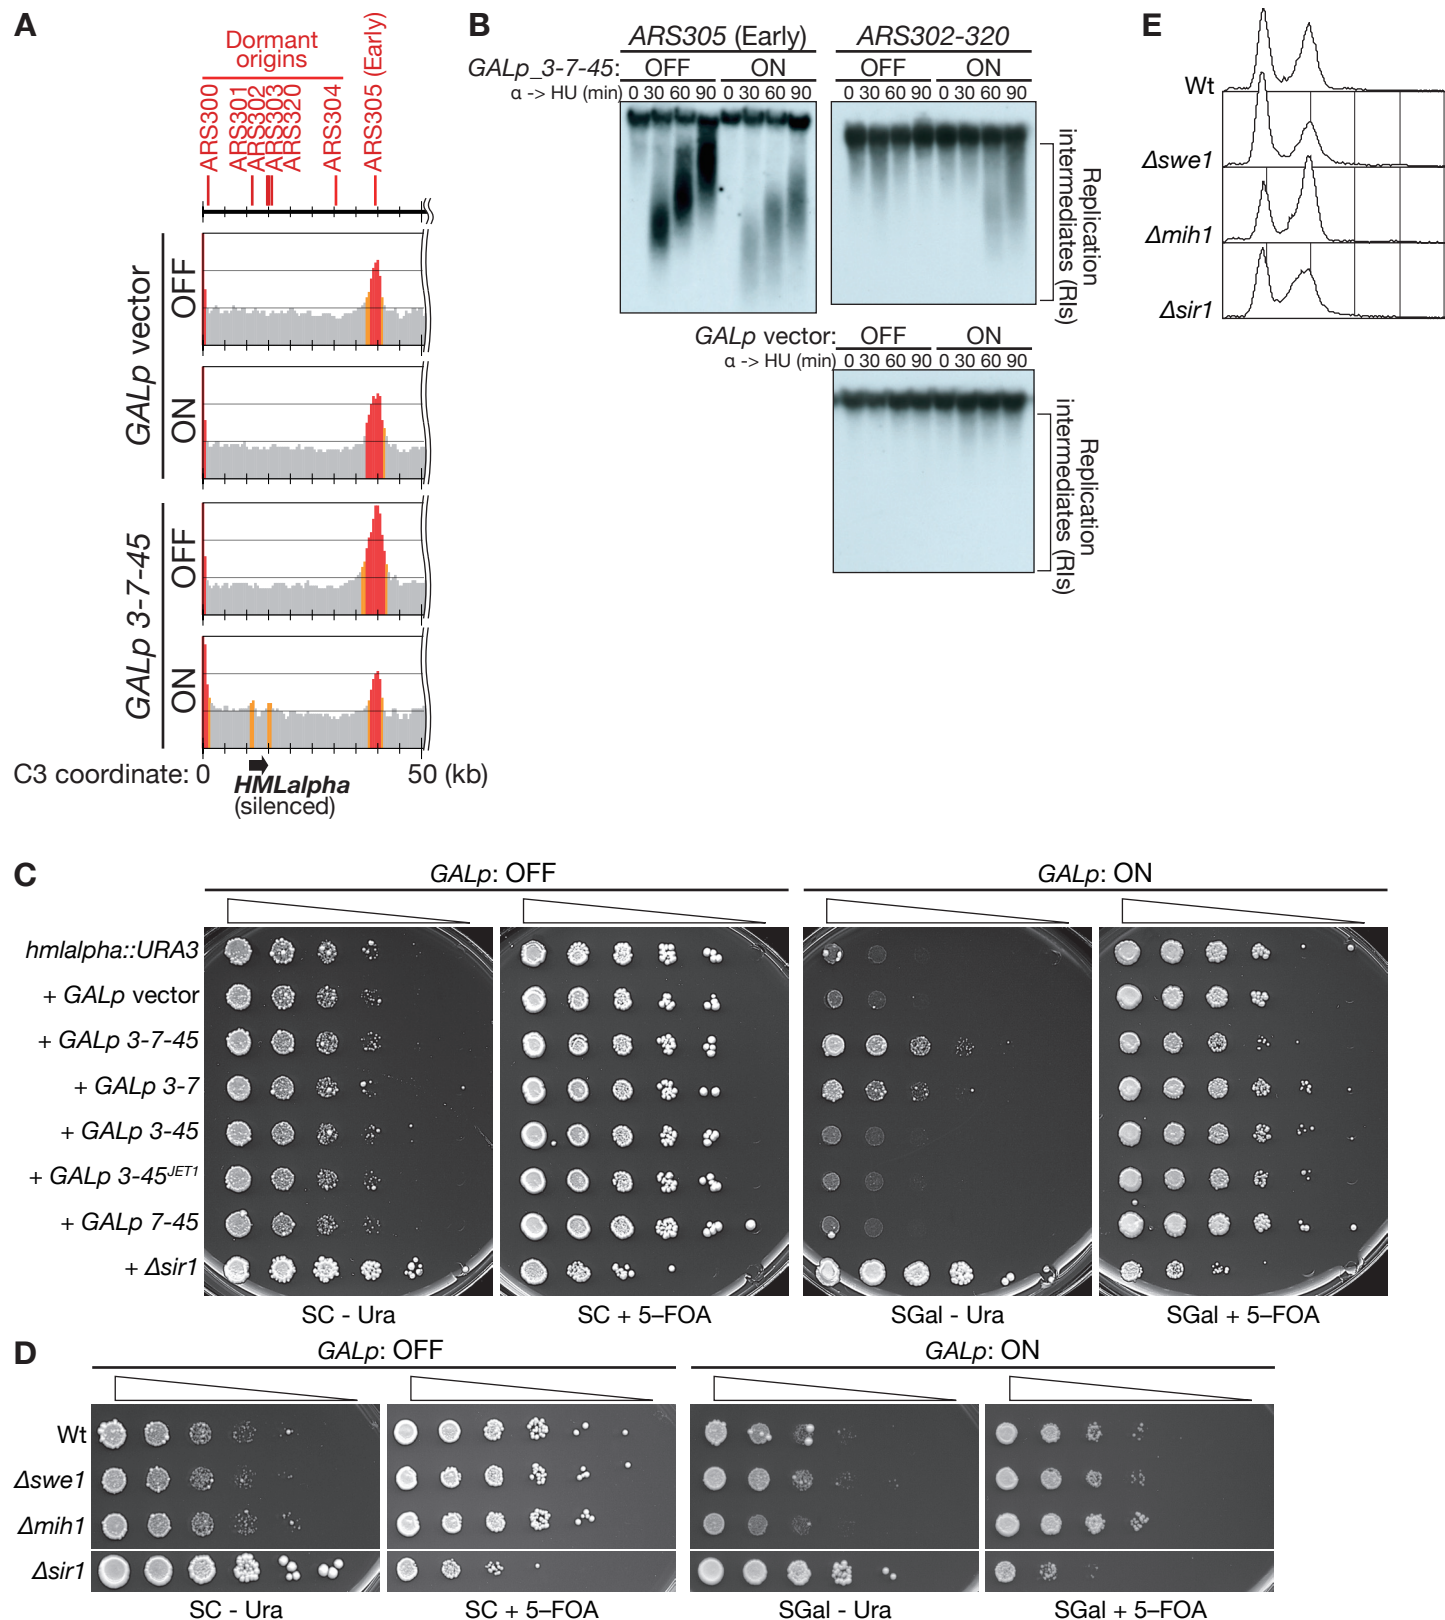

**Supplementary Figure S1. Dormant origins located in and near the silenced locus *HML* are activated upon 3-7-45 expression.**

**A.** Replication profile of the left end of Chromosome III in cells harboring the GALp vector (YST1038) or GALp-*SLD3-SLD7-CDC45* (YST1054). For details, see (TANAKA *et al.* 2011). **B.** YST1054 cells harboring GALp-*SLD3-SLD7-CDC45* were arrested in G1 and synchronously released into HU-containing media after induction of genes by addition of galactose (ON). Chromosomal DNA was isolated, separated using alkaline gels, and detected with *ARS305*- and *ARS302-320*-specific probes. **C.** *HML::URA3* (UCC3515) and *HML!*::*URA3* cells harboring GALp vector (YST1788), GALp-3-7-45 (YST1790), GALp-3-7 (YST1882), GALp-3-45 (YST1878), GALp-3-45<sup>JET1</sup> (YST1880), GALp-7-45 (YST1884), or  $\Delta sir1$  (YST1861) were serially diluted, spotted on the indicated plates, and grown at 30°C. **D.** *HML!*::*URA3* harboring GALp-3-7-45 (wt, YST1790), its  $\Delta swe1$  and  $\Delta mih1$  derivatives (YST1896 and YST1898, respectively), and *HML!*::*URA3*  $\Delta sir1$  (YST1861) cells were serially diluted, spotted on the indicated plates, and grown at 30°C. **E.** The cells used in D were grown in YPA-galactose, and their DNA contents were analyzed by flow cytometry.
