# Supplementary material
Source: publisher figshare collection journal article supplement (https://gsajournals.figshare.com/articles/dataset/_/13172369)
Supplement: Supplementary file 3 [file 1]

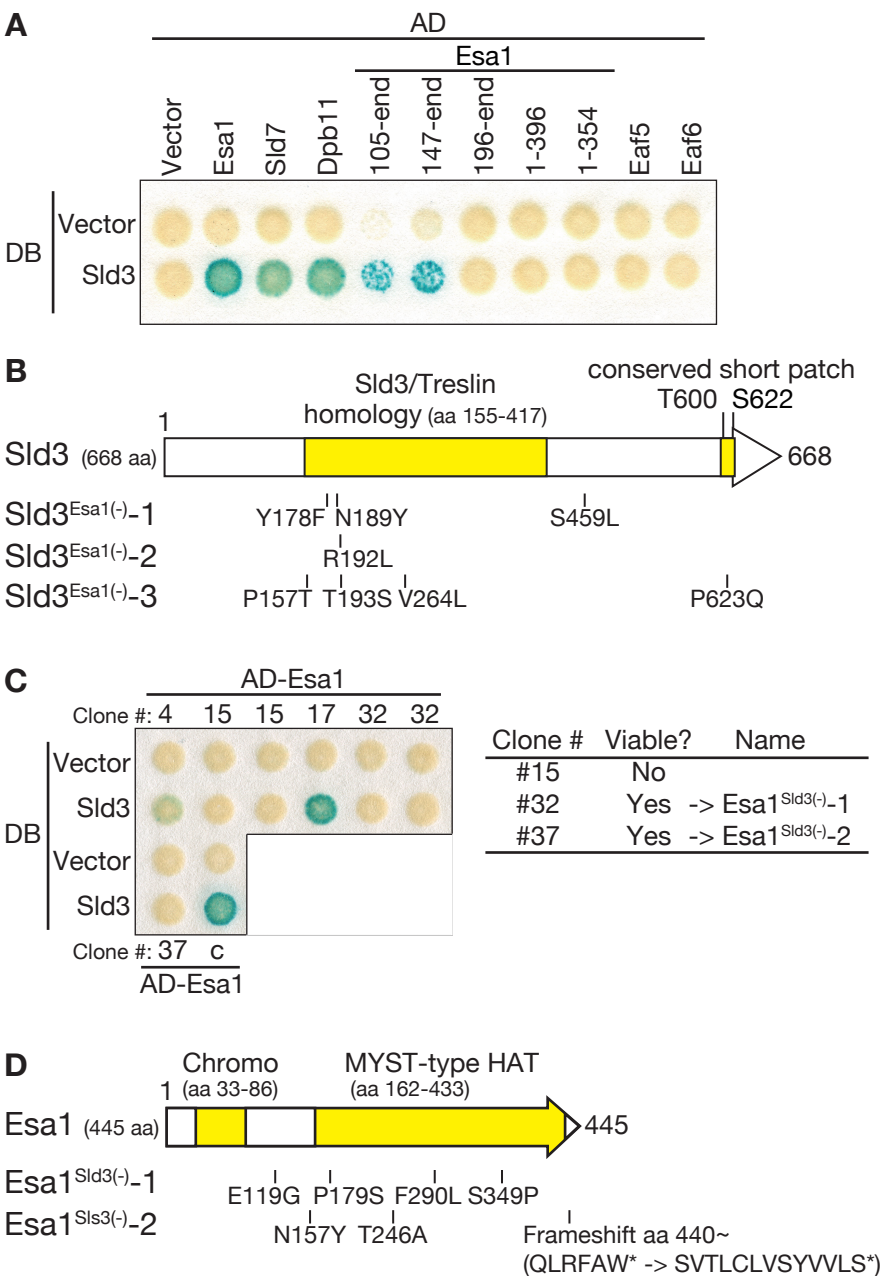

**Supplementary Figure S4. Isolation of mutants that diminish the Sld3–Esa1 interaction.**

**A.** Interaction between Sld3 and various Esa1 constructs, Eaf5, and Eaf6 were tested in the Y2H analysis. AD: activation domain. DB: DNA-binding domain. **B.** Schematics of Sld3<sup>Esa1(-)</sup> mutant proteins. Numbers indicate the positions of amino acid residues. **C.** Isolation of Esa1<sup>Sld3(-)</sup> mutants. Interactions between Esa1<sup>Sld3(-)</sup> candidates and Sld3 were tested in the Y2H. Clone # indicates the initial number of candidates. c: Positive control (Esa1) for the Y2H. Clone #15 lacked an interaction with Sld3 in this assay, as did #32 and #37. However, plasmid shuffling assay revealed that #15 could not support cell growth, whereas #32 and #37 could. Therefore, #15 was not retained as an Esa1<sup>Sld3(-)</sup> mutant and #32 and #37 were named Esa1<sup>Sld3(-)</sup>-1 and -2, respectively. (see Materials and Methods). **D.** Schematics of Esa1<sup>Sld3(-)</sup> mutant proteins. Numbers indicate the positions of amino acid residues.
