# Supplementary material
Source: publisher figshare collection journal article supplement (https://gsajournals.figshare.com/articles/dataset/_/13172369)
Supplement: Supplementary file 4 [file 1]

**Supplementary Table S2. Summary of the results of initial Y2H screen**

|                   | AD vector | Sld3 | Sld7 | Cdc45 |
|-------------------|-----------|------|------|-------|
| LexA vector       | -*        | -    | -    | -     |
| Ahc1              | -         | -    | -    | -     |
| Ada2              | +**       | +    | +    | +     |
| SWC4              | n.t.***   | n.t. | n.t. | n.t.  |
| Eaf7              | -         | -    | -    | -     |
| Sas2              | -         | -    | -    | -     |
| Sgf11             | ++**      | ++   | ++   | ++    |
| Hif1              | -         | ++   | +    | -     |
| Nto1              | -         | -    | -    | -     |
| Hpa2              | -         | -    | -    | -     |
| Ngg1              | +         | +    | +    | +     |
| Hfi1              | ++        | ++   | ++   | ++    |
| Hat1              | -         | ++   | -    | -     |
| Esa1              | +         | ++   | +    | +     |
| Ahc2              | ++        | ++   | ++   | ++    |
| Eaf1              | +         | +    | -    | -     |
| Rtt109            | -         | -    | -    | -     |
| Vps75             | -         | -    | -    | -     |
| Elp3              | -         | -    | -    | -     |
| Yng2              | -         | -    | -    | -     |
| Tra1              | ++        | ++   | ++   | ++    |
| Hat2              | -         | ++   | -    | -     |
| Yng1              | -         | -    | -    | -     |
| Gcn5              | +         | +    | +    | +     |
| Jhd2              | -         | -    | -    | -     |
| Set1              | -         | -    | -    | -     |
| Mot2              | -         | -    | -    | -     |
| Dpb11 (+ control) | -         | +    | -    | -     |

-: no signal (white color)

+ and ++: blue signal (++ is stronger than +)

n.t.: not tested because of no transformants appeared.
