# Supplementary material
Source: publisher figshare collection journal article supplement (https://gsajournals.figshare.com/articles/dataset/_/13172369)
Supplement: Supplementary file 5 [file 1]

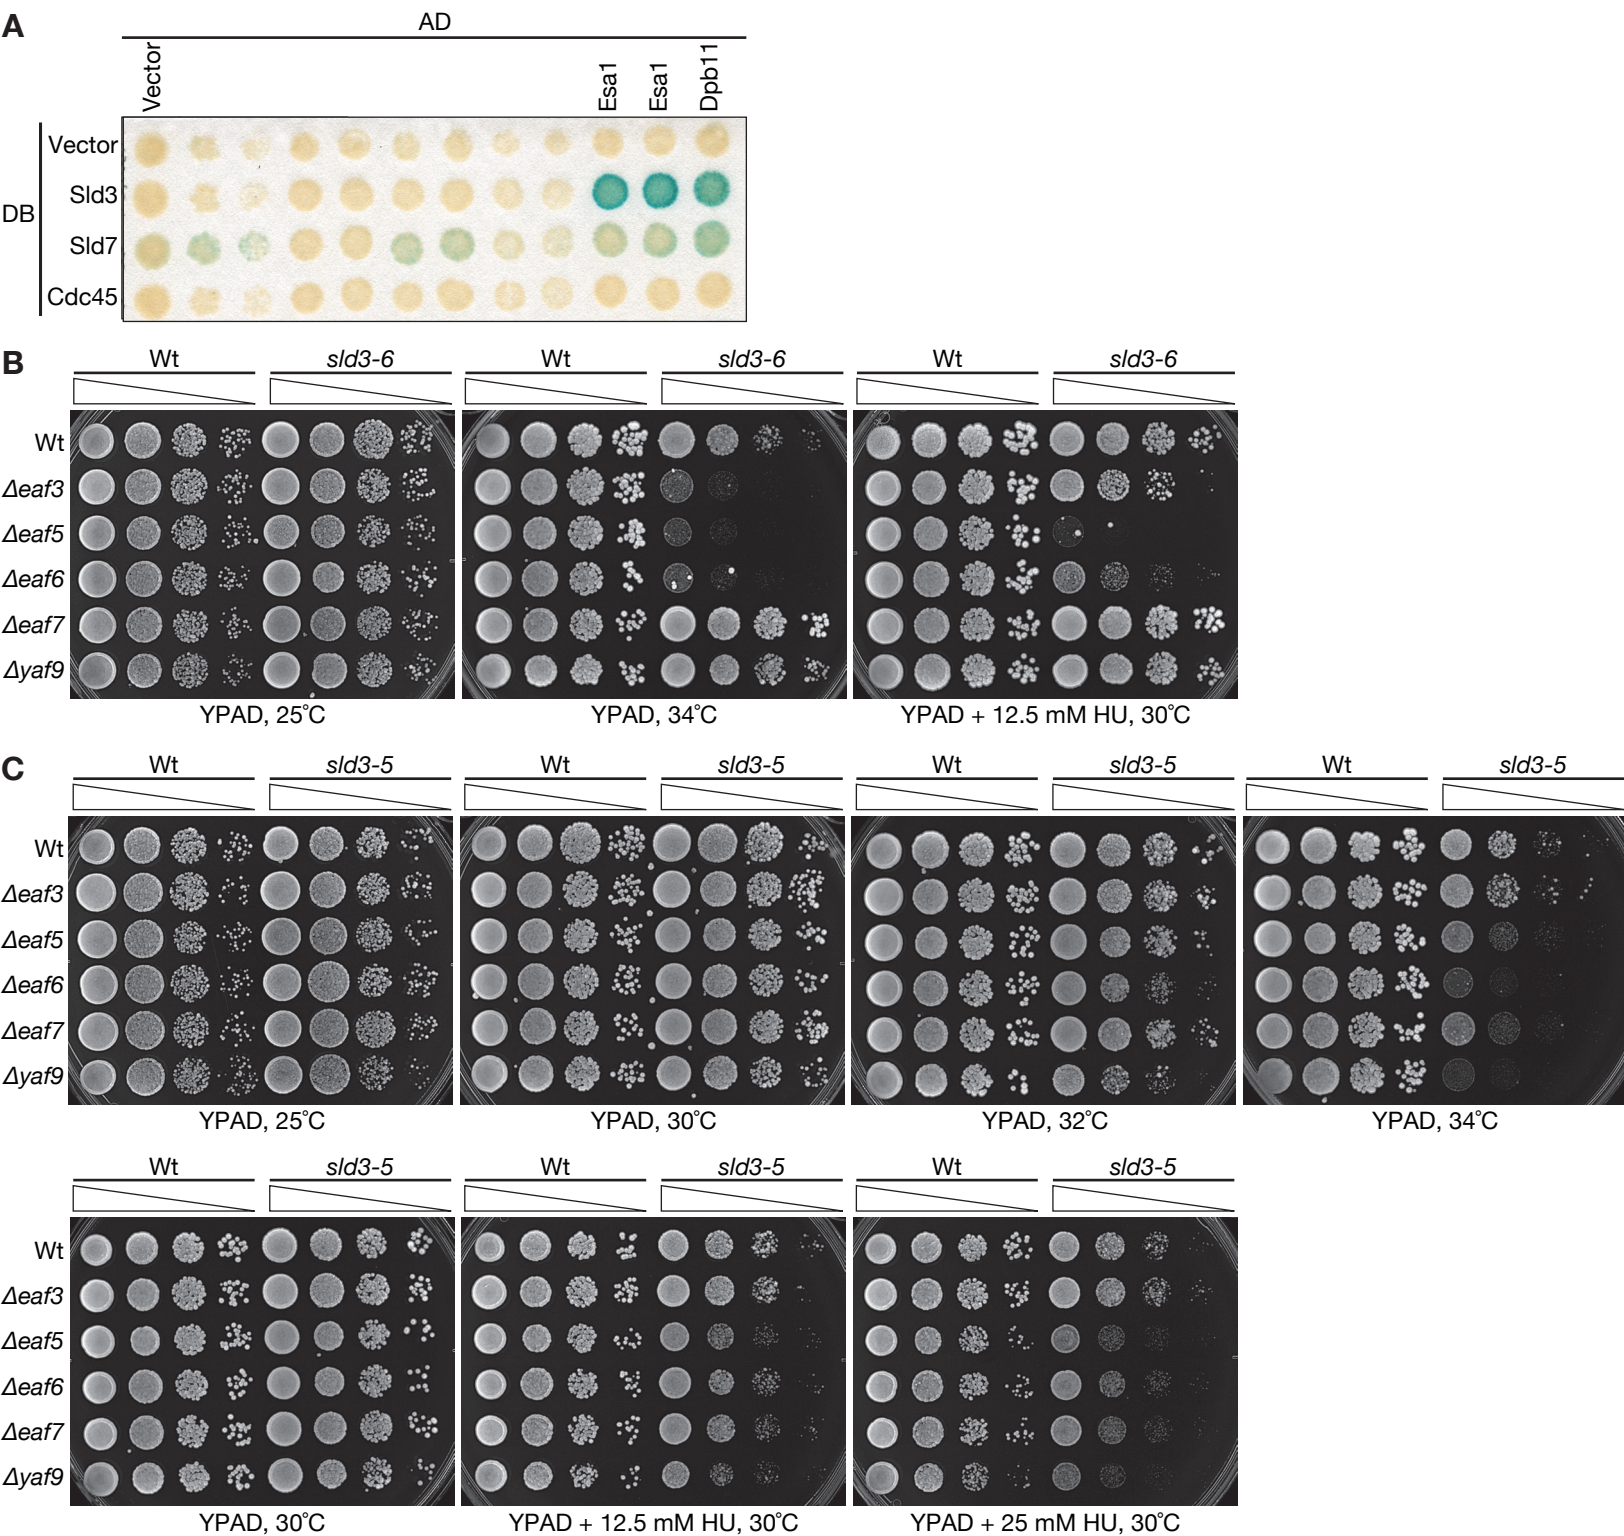

**Supplementary Figure S2. Sld3 interacts with Esa1.**

**A.** Original image of Fig. 2A. **B.**  $\Delta$ *eaf3*,  $\Delta$ *eaf5*,  $\Delta$ *eaf6*,  $\Delta$ *eaf7*, and  $\Delta$ *yaf9* cells in the wild-type (Wt) or *sld3-6* background were spotted and grown under the indicated conditions. Strains used were W303-1a  $\Delta$ bar1, YST2327, YST2329, YST2330, YST2331 and YST2551 (wild type background, from top) and YYK16, YST3406, YST2313, YST2314, YST3407 and YST3408 (*sld3-6* background, from top). **C.**  $\Delta$ *eaf3*,  $\Delta$ *eaf5*,  $\Delta$ *eaf6*,  $\Delta$ *eaf7*, and  $\Delta$ *yaf9* cells in the wild-type (Wt) or *sld3-5* background were spotted and grown under the indicated conditions. Strains used were W303-1a  $\Delta$ bar1, YST2327, YST2329, YST2330, YST2331 and YST2551 (wild type background, from top) and YYK19, YST3402, YST2616, YST2617, YST3403 and YST3404 (*sld3-5* background, from top).
