# Supplementary material
Source: publisher figshare collection journal article supplement (https://gsajournals.figshare.com/articles/dataset/_/13172369)
Supplement: Supplementary file 7 [file 1]

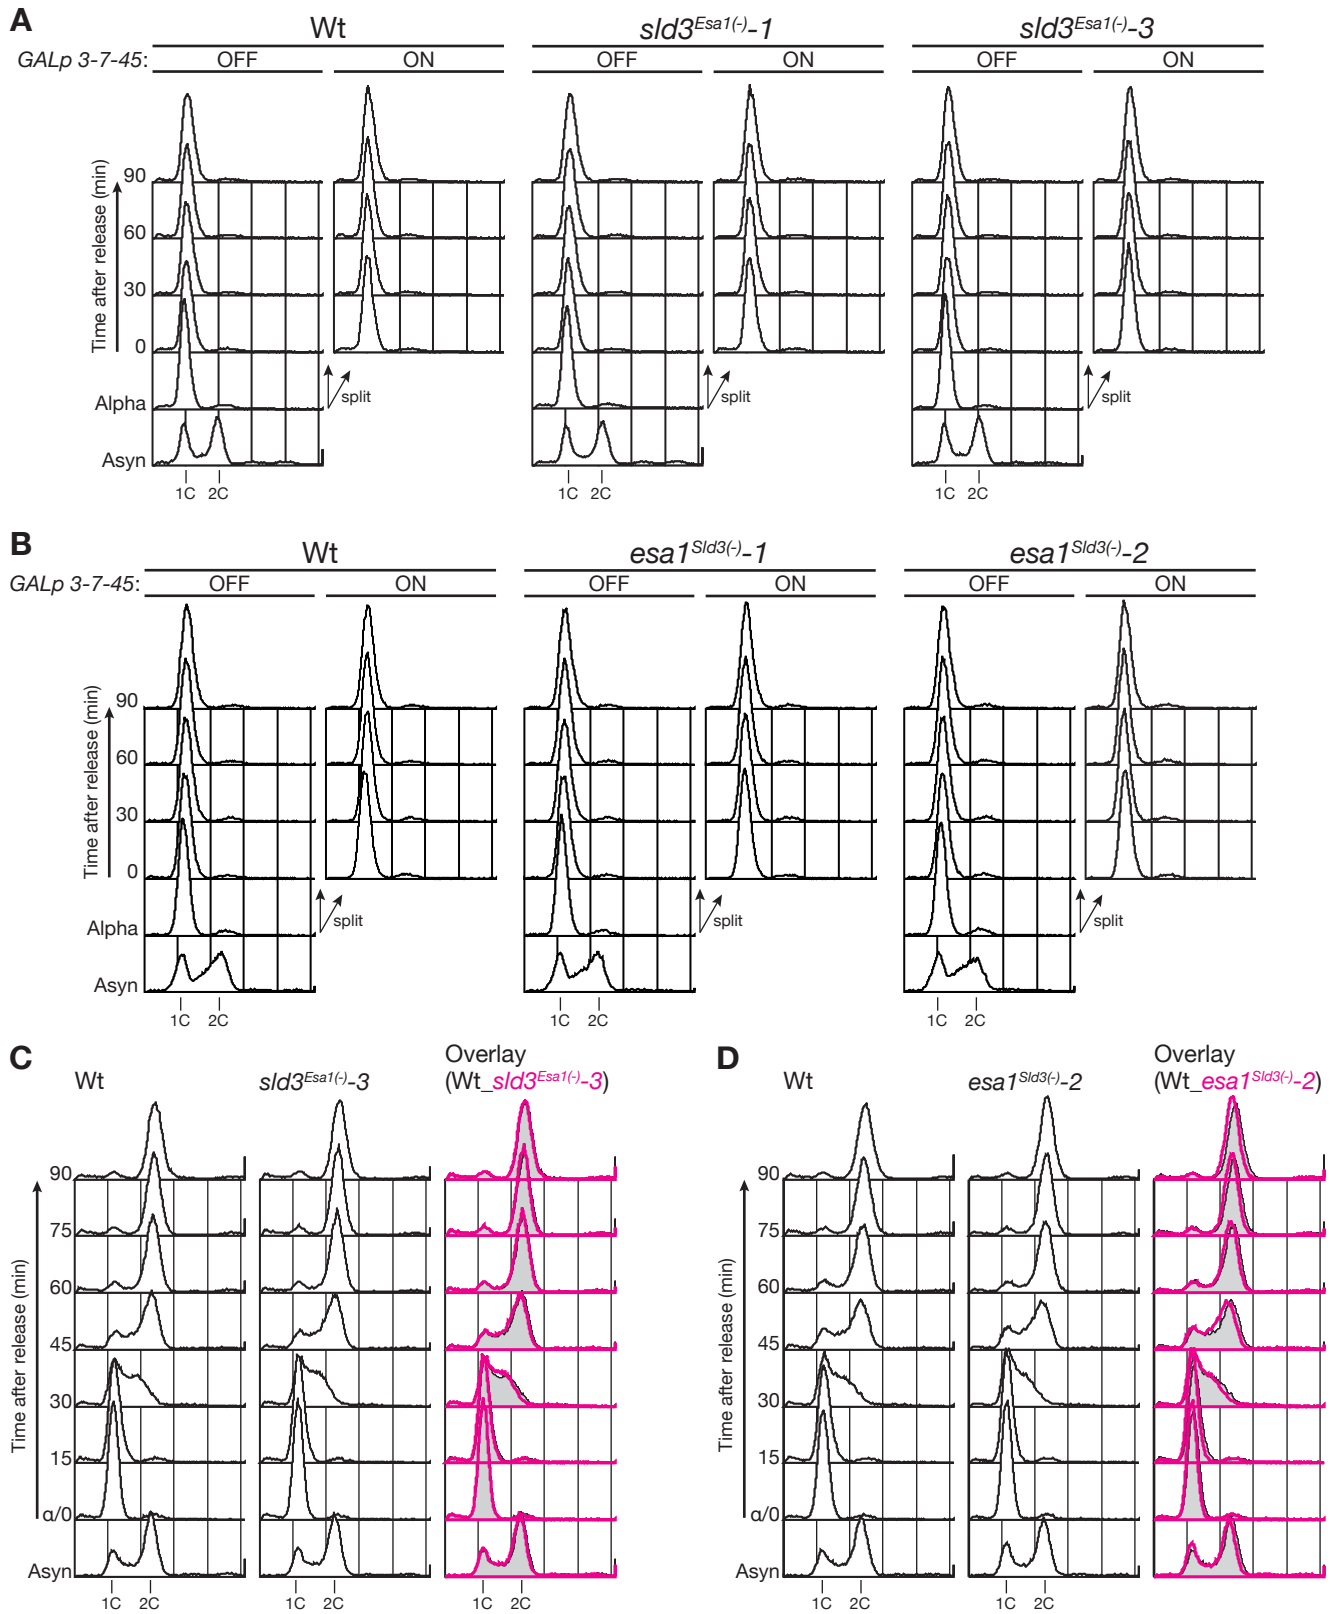

**Supplementary Figure S5. Analysis of the mutants that diminish the Sld3–Esa1 interaction.**

**A, B.** Aliquots of samples from Fig. 5A and 5B were analyzed by flow cytometry. **C, D.** Wild-type (YST2843 in C and W303-1a  $\Delta$ bar1 in D), *sld3<sup>Esa1(-)-3</sup>* (YST2870), and *esa1<sup>Sld3(-)-2</sup>* (YST2741) cells were grown in YPAD at 25°C, arrested in G1 with factor, and synchronously released. Samples were taken at the indicated times and analyzed by flow cytometry.
